# Supplementary material for: Comparative profiling of single-cell transcriptome reveals heterogeneity of tumor microenvironment between solid and acinar lung adenocarcinoma
Source: Springer Nature journal article supplement (doi:10.1186/s12967-022-03620-3), 2022-09-22

**A**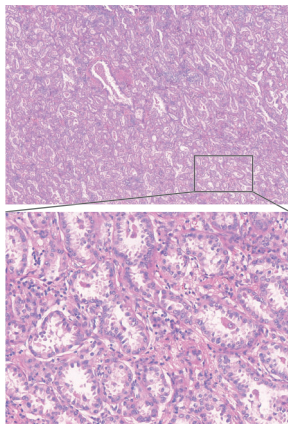**B**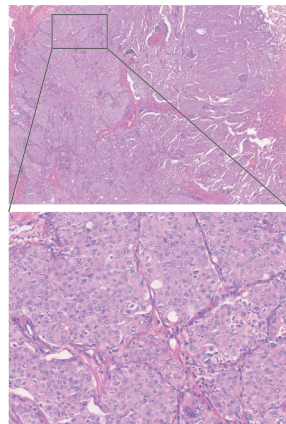**C**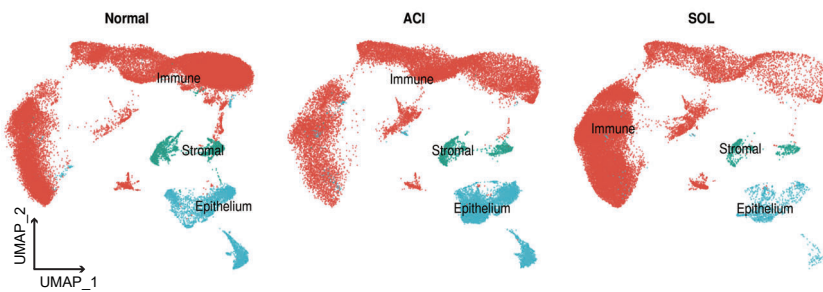**D**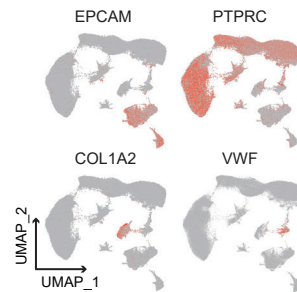

inferCNV

**E**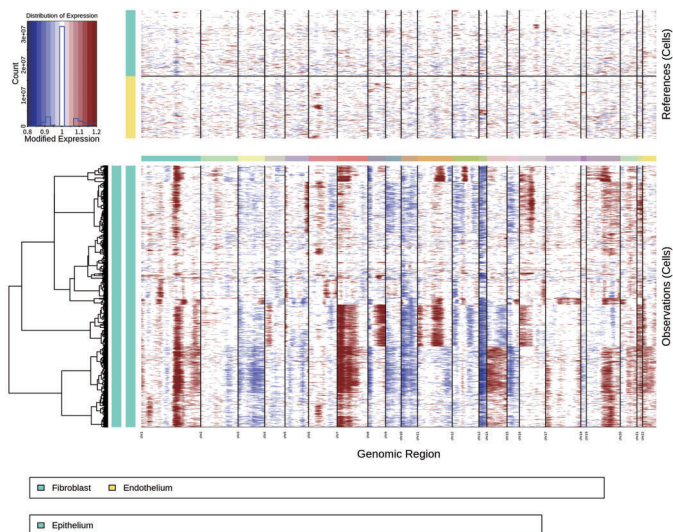

Supplement: MOESM7 [file 23527478]
