# Supplementary material for: Comparative profiling of single-cell transcriptome reveals heterogeneity of tumor microenvironment between solid and acinar lung adenocarcinoma
Source: Springer Nature journal article supplement (doi:10.1186/s12967-022-03620-3), 2022-09-22

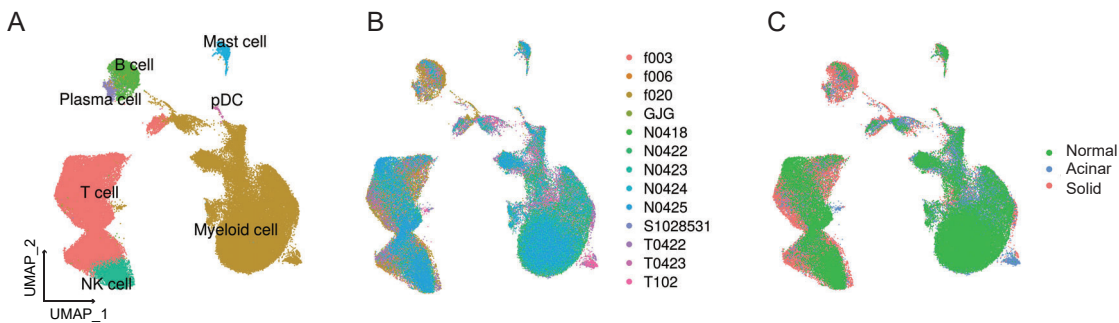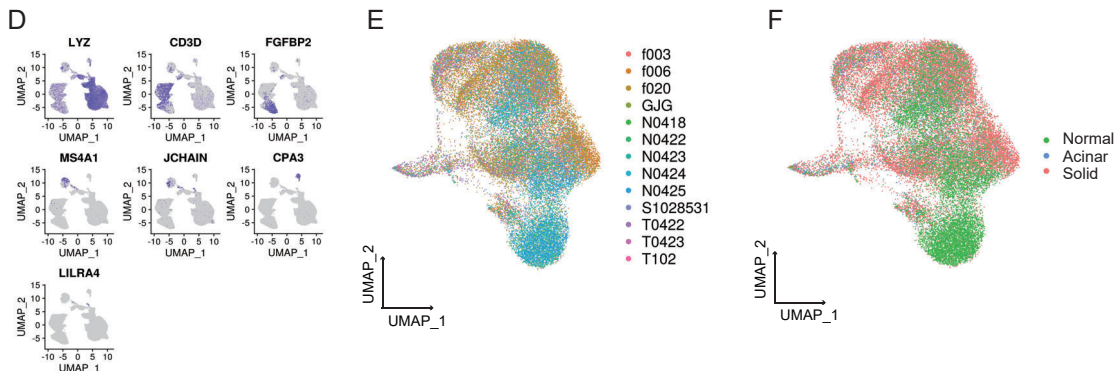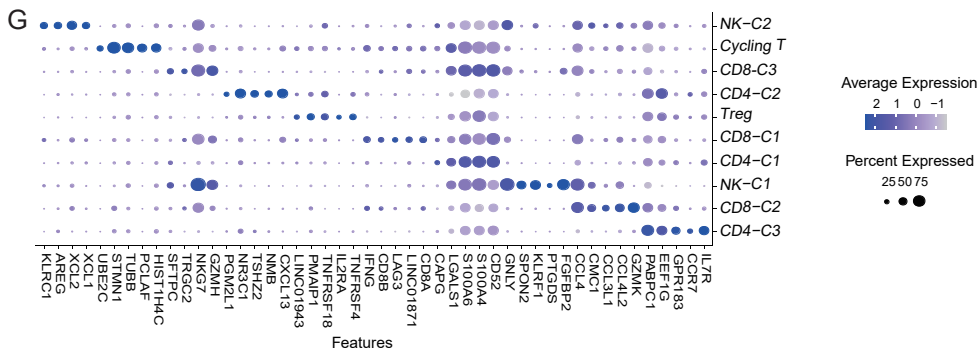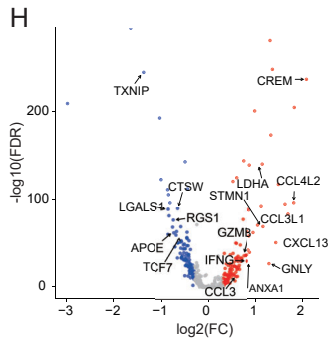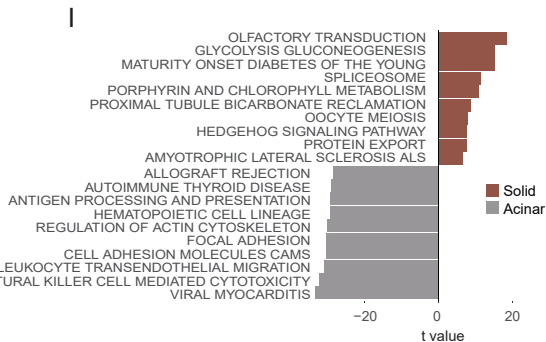

Supplement: MOESM10 [file 23527478]
